# Supplementary material for: Association of Plasma Metabolites and Lipoproteins with Rh and ABO Blood Systems in Healthy Subjects
Source: PubMed Central journal article supplement (PMC9639206; doi:10.1021/acs.jproteome.2c00375), 2022-10-18
Supplement: pr2c00375_si_001.pdf [file pr2c00375_si_001.pdf]

# **SUPPLEMENTARY MATERIAL: ASSOCIATION OF PLASMA METABOLITES AND LIPOPROTEINS WITH RH AND ABO BLOOD SYSTEMS IN HEALTHY SUBJECTS**

*Francesca Di Cesare<sup>1,2</sup>, Leonardo Tenori<sup>1,2,3</sup>, Claudio Luchinat<sup>1,2,3</sup>, Edoardo Saccenti<sup>4,\*</sup>.*

<sup>1</sup> Magnetic Resonance Center (CERM), , University of Florence, Via Luigi Sacconi 6, 50019, Sesto Fiorentino, Firenze, Italy

<sup>2</sup> Consorzio Interuniversitario Risonanze Magnetiche di Metallo Proteine (CIRMMP), University of Florence, Via Luigi Sacconi 6, 50019, Sesto Fiorentino, Firenze, Italy

<sup>3</sup> Department of Chemistry “Ugo Schiff”, University of Florence, Via della Lastruccia 3, 50019, Sesto Fiorentino, Italy

<sup>4</sup> Laboratory of Systems and Synthetic Biology, Wageningen University & Research, Stippeneng 4, 6708 WE, Wageningen, the Netherlands.

\*To whom correspondence should be addressed: Edoardo Saccenti, Laboratory of Systems and Synthetic Biology, Wageningen University & Research, Stippeneng 4, 6708 WE, Wageningen, the Netherlands. E-mail: edoardo.saccenti@wur.nl

## **Content:**

|        |                         |
|--------|-------------------------|
| Page 2 | Supplementary Table S1  |
| Page 3 | Supplementary Figure S1 |

## Supplementary Tables

**Table S1:** Robust linear regression models performed on serum metabolites and lipids of the ABO blood groups post-hoc tests. Only molecular compounds with a  $P$ -value  $< 0.05$  were reported. For each comparison, estimate value, Standard Deviation (SD),  $P$ -value, the FDR adjusted  $P$ -values, and model name are also reported.

| <b>ABO blood group comparison</b> | <b>Estimate</b> | <b>SD</b> | <b><math>P</math>-value</b> | <b>FDR <math>P</math>-value</b> | <b>Model name</b>      |
|-----------------------------------|-----------------|-----------|-----------------------------|---------------------------------|------------------------|
| A - AB                            | 3.18            | 1.08      | 0.02                        | 0.08                            | PN LDL2                |
| AB - O                            | 0.82            | 0.81      | 0.02                        | 0.08                            | PN LDL2                |
| A - AB                            | 0.15            | 0.35      | 0.02                        | 0.08                            | Subfr Chol – LDL2      |
| AB - O                            | -0.99           | 0.34      | 0.02                        | 0.08                            | Subfr Chol – LDL2      |
| A - AB                            | 0.55            | 0.19      | 0.02                        | 0.08                            | Subfr Free Chol – LDL2 |
| AB - O                            | -0.52           | 0.18      | 0.02                        | 0.08                            | Subfr Free Chol – LDL2 |
| A - AB                            | 0.68            | 0.24      | 0.02                        | 0.08                            | Subfr PL – LDL2        |
| AB - O                            | -0.65           | 0.23      | 0.03                        | 0.10                            | Subfr PL – LDL2        |
| A - AB                            | 0.75            | 0.25      | 0.02                        | 0.08                            | Subfr ApoB – LDL2      |
| AB - O                            | -0.71           | 0.25      | 0.02                        | 0.08                            | Subfr ApoB – LDL2      |
| A - AB                            | 0.33            | 0.09      | 0.003                       | 0.05                            | Subfr Chol – HDL2      |
| AB - O                            | -0.31           | 0.09      | 0.007                       | 0.07                            | Subfr Chol – HDL2      |
| A - AB                            | 0.36            | 0.11      | 0.004                       | 0.05                            | Subfr PL – HDL2        |
| AB - O                            | -0.32           | 0.11      | 0.01                        | 0.08                            | Subfr PL – HDL2        |
| A - AB                            | 0.91            | 0.25      | 0.002                       | 0.04                            | Subfr ApoA1 – HDL1     |
| AB - B                            | -0.77           | 0.29      | 0.04                        | 0.11                            | Subfr ApoA1 – HDL1     |
| AB - O                            | -0.91           | 0.25      | 0.001                       | 0.04                            | Subfr ApoA1 – HDL1     |

Abbreviation used: Subfr, Subfractions; Chol, Cholesterol; LMF, Lipoprotein Main Fractions; PN, Particle Number; TG, Triglycerides

## Supplementary Figures

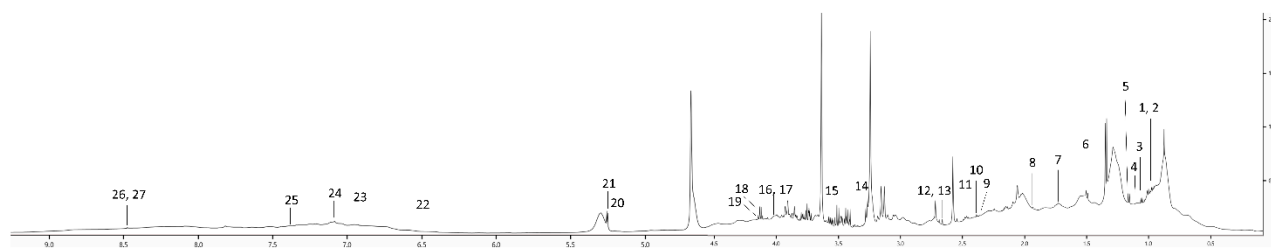

**Figure S1:** Assignment of a plasma  $^1\text{H}$ -NOESY spectrum. 1, leucine; 2, isoleucine; 3, valine; 4, unknown 1; 5, 3-hydroxybutyrate; 6, alanine; 7, arginine+lysine; 8, acetate; 9, glutamate; 10, pyruvate; 11, glutamine; 12, methionine; 13, citrate; 14, unknown 2; 15, glycine; 16, creatine; 17, creatinine; 18, lactate; 19, proline; 20, mannose; 21, glucose; 22, fumarate; 23, tyrosine; 24, histidine; 25, phenylalanine; 26, formate; 27, adenosine nucleotide+inosine monophosphate
